# Supplementary material for: Identification of functional features of synthetic SINEUPs, antisense lncRNAs that specifically enhance protein translation
Source: PubMed Central journal article supplement (PMC5802440; doi:10.1371/journal.pone.0183229), 2018-02-07

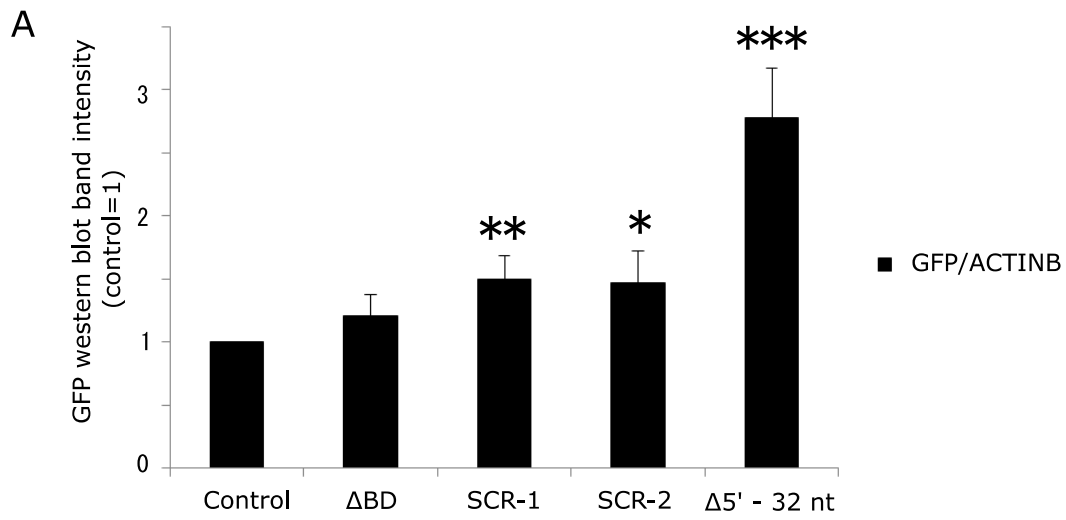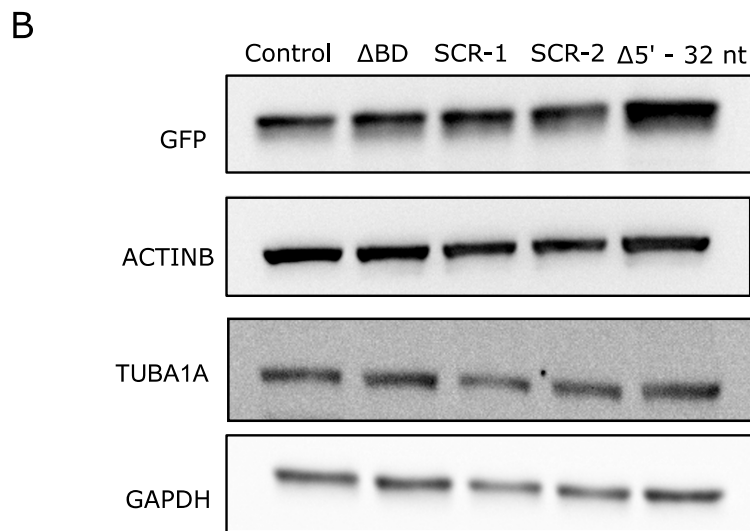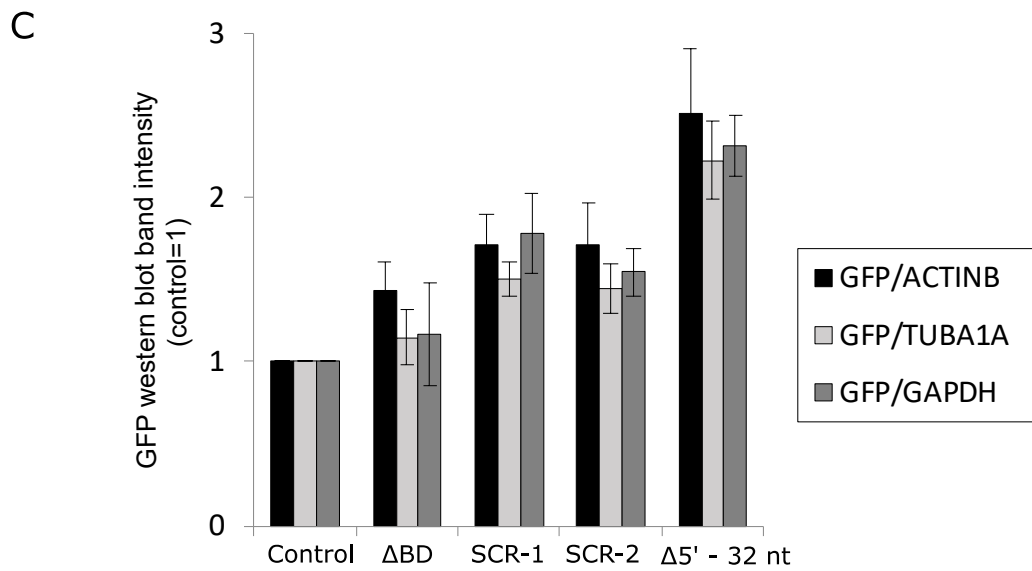

Supplement: pone.0183229.s003.pdf [file pone.0183229.s003.pdf]
